# Supplementary material for: Polymorphisms in the Glucagon-Like Peptide 1 Receptor (GLP-1R) Gene Are Associated with the Risk of Coronary Artery Disease in Chinese Han Patients with Type 2 Diabetes Mellitus: A Case-Control Study
Source: Hindawi journal article supplement (doi:10.1155/2018/1054192), 2018-09-09
Supplement: f1 [file 1054192.f1.pdf]

Supplementary Material 1

Distribution of SNP genotype frequencies in CAD-positive and control groups in dominant inheritance mode

| SNPs       | CAD-pos.<br>n = 394(%) | Controls<br>n = 217(%) | OR    | 95% CI      | <i>P</i> | OR <sub>a</sub> | 95% CI <sub>a</sub> | <i>P</i> <sub>a</sub> |
|------------|------------------------|------------------------|-------|-------------|----------|-----------------|---------------------|-----------------------|
| rs761387   |                        |                        |       |             |          |                 |                     |                       |
| CX         | 126(32.0)              | 75(34.6)               | 0.890 | 0.627–1.264 | 0.516    | 0.871           | 0.546–1.390         | 0.563                 |
| TT         | 268(68.0)              | 142(65.4)              | 1     |             |          | 1               |                     |                       |
| rs2268635  |                        |                        |       |             |          |                 |                     |                       |
| AX         | 226(57.4)              | 108(49.8)              | 1.358 | 0.973–1.894 | 0.071    | 1.071           | 0.684–1.676         | 0.765                 |
| GG         | 168(42.6)              | 109(50.2)              | 1     |             |          | 1               |                     |                       |
| rs7769547  |                        |                        |       |             |          |                 |                     |                       |
| AX         | 292(74.1)              | 163(75.1)              | 0.948 | 0.648–1.389 | 0.785    | 0.804           | 0.474–1.363         | 0.418                 |
| GG         | 102(25.9)              | 54(24.9)               | 1     |             |          | 1               |                     |                       |
| rs910162   |                        |                        |       |             |          |                 |                     |                       |
| AX         | 303(76.9)              | 160(73.7)              | 1.186 | 0.809–1.739 | 0.381    | 1.062           | 0.632–1.785         | 0.820                 |
| TT         | 91(23.1)               | 57(26.3)               | 1     |             |          | 1               |                     |                       |
| rs3765468  |                        |                        |       |             |          |                 |                     |                       |
| AX         | 126(32.0)              | 74(34.1)               | 0.909 | 0.639–1.291 | 0.593    | 0.913           | 0.571–1.461         | 0.704                 |
| GG         | 268(68.0)              | 143(65.9)              | 1     |             |          | 1               |                     |                       |
| rs3765467  |                        |                        |       |             |          |                 |                     |                       |
| AX         | 154(39.1)              | 74(34.1)               | 1.240 | 0.877–1.753 | 0.223    | 0.963           | 0.609–1.521         | 0.870                 |
| GG         | 240(60.9)              | 143(65.9)              | 1     |             |          | 1               |                     |                       |
| rs3765466  |                        |                        |       |             |          |                 |                     |                       |
| TX         | 328(83.2)              | 182(83.9)              | 0.956 | 0.611–1.496 | 0.843    | 0.741           | 0.388–1.417         | 0.365                 |
| AA         | 66(16.8)               | 35(16.1)               | 1     |             |          | 1               |                     |                       |
| rs10305456 |                        |                        |       |             |          |                 |                     |                       |
| TX         | 64(16.2)               | 40(18.4)               | 0.858 | 0.555–1.326 | 0.491    | 1.114           | 0.611–2.030         | 0.725                 |
| CC         | 330(83.8)              | 177(81.6)              | 1     |             |          | 1               |                     |                       |
| rs10305518 |                        |                        |       |             |          |                 |                     |                       |
| GX         | 113(28.7)              | 62(28.6)               | 1.005 | 0.697–1.451 | 0.977    | 0.827           | 0.504–1.356         | 0.452                 |
| TT         | 281(71.3)              | 155(71.4)              | 1     |             |          | 1               |                     |                       |
| rs1820     |                        |                        |       |             |          |                 |                     |                       |
| AX         | 53(13.5)               | 28(12.9)               | 1.049 | 0.642–1.715 | 0.848    | 1.202           | 0.604–2.392         | 0.600                 |
| TT         | 341(86.5)              | 189(87.1)              | 1     |             |          | 1               |                     |                       |
| rs4714210  |                        |                        |       |             |          |                 |                     |                       |
| GX         | 221(56.1)              | 129(59.4)              | 0.871 | 0.623–1.220 | 0.422    | 0.963           | 0.613–1.514         | 0.870                 |
| AA         | 173(43.9)              | 88(40.6)               | 1     |             |          | 1               |                     |                       |

CAD, coronary artery disease; OR, odds ratio; CI, confidence interval. OR<sub>a</sub>, CI<sub>a</sub>, and *p*<sub>a</sub> represent OR, CI, and *p* after adjustment for gender, age, BMI, smoking status, dyslipidemia history, hypertension history, and diabetic duration. OR, 95% CI, and *p* values were compared using Chi-square analysis. OR<sub>a</sub>, CI<sub>a</sub>, and *p*<sub>a</sub> were assessed with multiple logistic regression analysis.

Supplementary Material 2

Association of common haplotypes with CAD risk

| Haplotype | rs910162   | rs3765468 | rs3765467 | rs3765466 | rs10305456 | CAD-pos.(%) | Controls(%) | <i>P</i> |
|-----------|------------|-----------|-----------|-----------|------------|-------------|-------------|----------|
| Block 1   |            |           |           |           |            |             |             |          |
| 1         | A          | G         | G         | T         | C          | 48.3        | 49.3        | 0.746    |
| 2         | T          | G         | A         | A         | C          | 21.8        | 18.9        | 0.221    |
| 3         | T          | A         | G         | A         | C          | 17.4        | 18.2        | 0.722    |
| 4         | T          | G         | G         | T         | T          | 8.1         | 9.2         | 0.486    |
| 5         | T          | G         | G         | A         | C          | 2.7         | 3.5         | 0.448    |
| Block 2   | rs761387   | rs7769547 |           |           |            |             |             |          |
| 1         | T          | A         |           |           |            | 47.1        | 50.0        | 0.336    |
| 2         | T          | G         |           |           |            | 35.2        | 31.3        | 0.168    |
| 3         | C          | G         |           |           |            | 17.1        | 18.2        | 0.612    |
| Block 3   | rs10305518 | rs1820    | rs4714210 |           |            |             |             |          |
| 1         | T          | T         | A         |           |            | 45.4        | 41.3        | 0.094    |
| 2         | T          | T         | G         |           |            | 31.5        | 36.8        | 0.107    |
| 3         | G          | T         | A         |           |            | 15.7        | 15.4        | 0.914    |
| 4         | T          | A         | A         |           |            | 7.2         | 6.2         | 0.952    |

CAD, coronary artery disease. Chi-square analysis was used for statistical comparisons. *P* values were acquired by haplotype analysis using Haploview 4.2 software.
